# Supplementary material for: Origins, timing and introgression of domestic geese revealed by whole genome data
Source: PubMed Central journal article supplement (PMC9926862; doi:10.1186/s40104-022-00826-9), 2023-02-13
Supplement: 40104_2022_826_MOESM2_ESM.pdf [file 40104_2022_826_MOESM2_ESM.pdf]

## Supplementary Figure

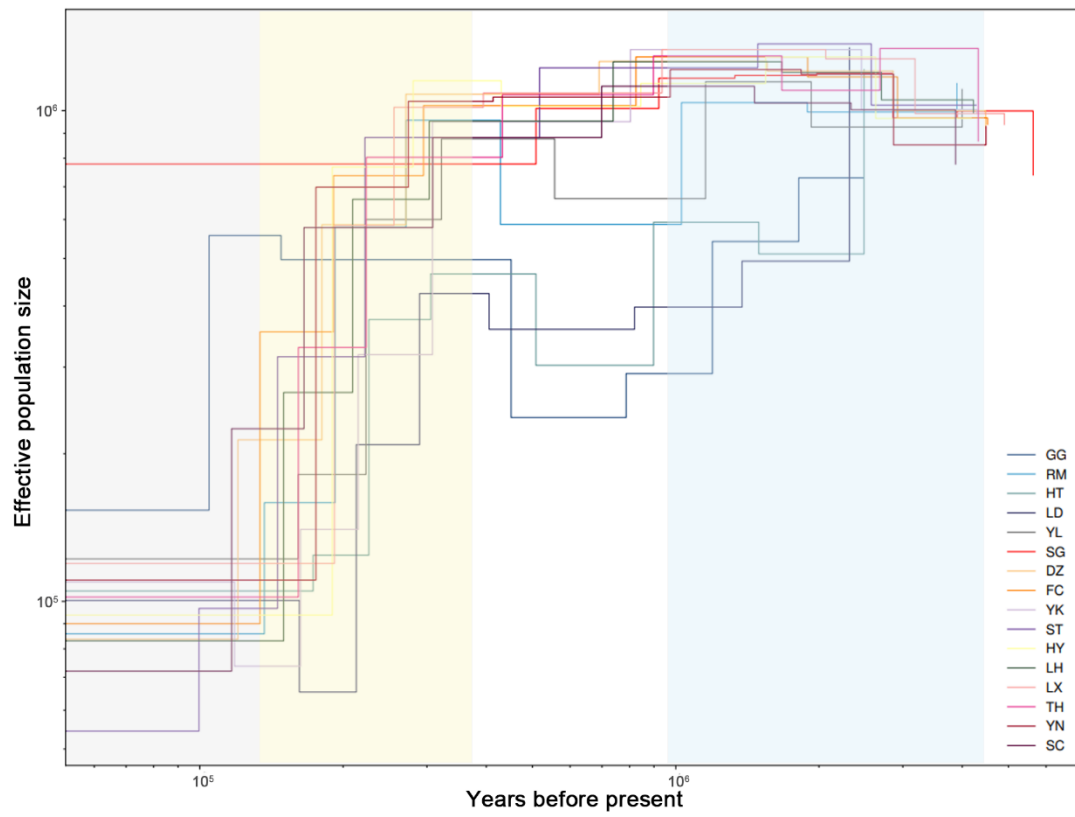

Fig. S1. Demographic history of domestic geese and their wild ancestors. Inferring effective population size using SMC++. Early Pleistocene shown in blue, Mid-Brunhes event shown in yellow, Last Glacial Period (LGP) shown in light grey. The time division was modified from Kozma et al [1].

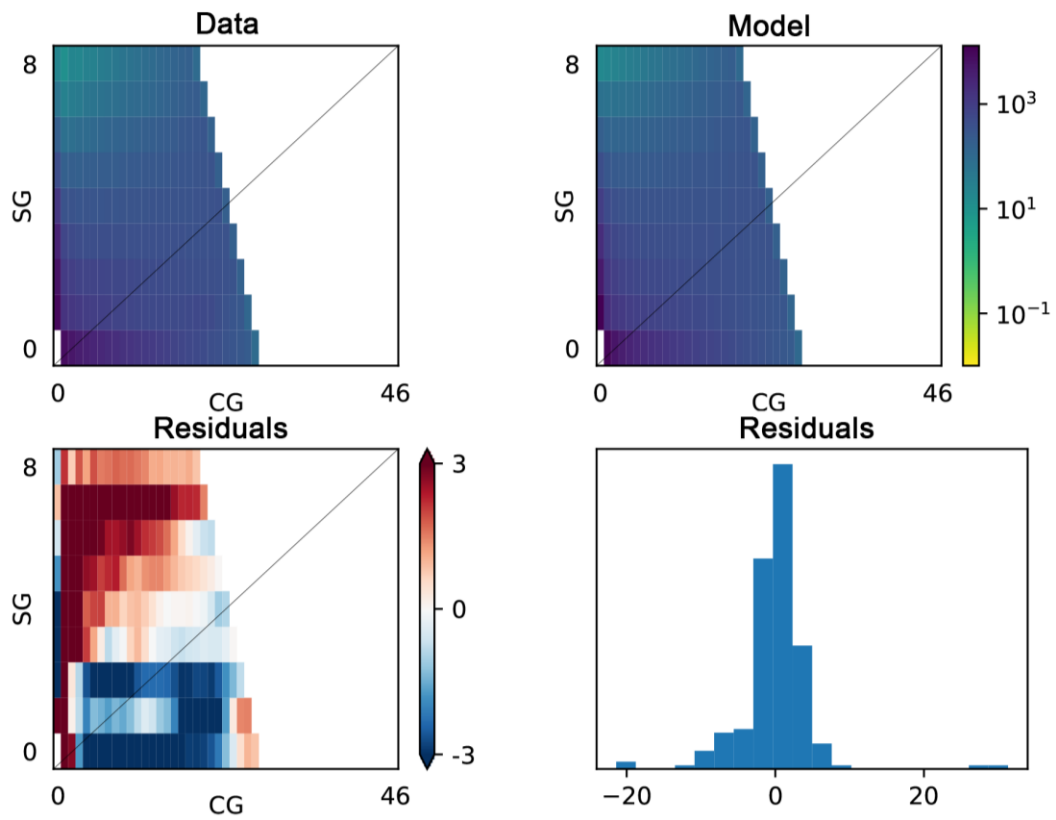

Fig. S2. Site frequency spectrum of the populations of swan and Chinese domestic geese, the first row shows the frequency spectrum of the data and the best model, and the second row shows the residuals between the data and the best model for each bin in the spectrum.

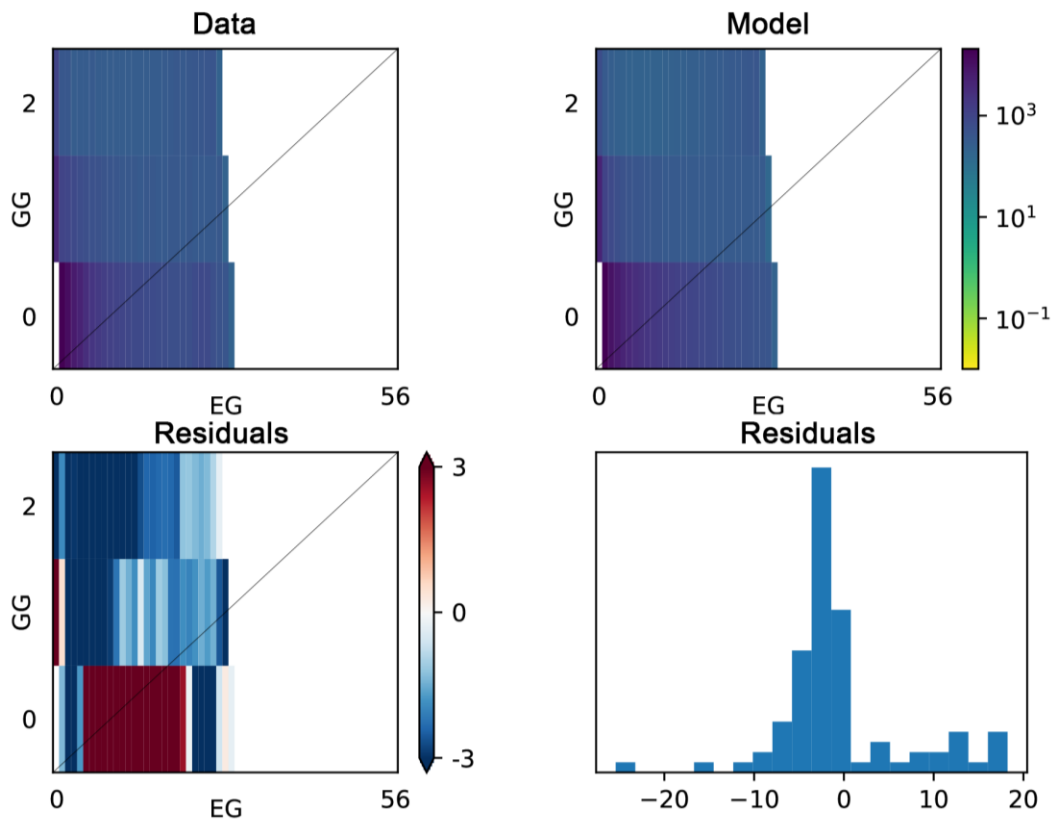

Fig. S3. Site frequency spectrum of the populations of greylag and European domestic geese, the first row shows the frequency spectrum of the data and the best model, and the second row shows the residuals between the data and the best model for each bin in the spectrum.

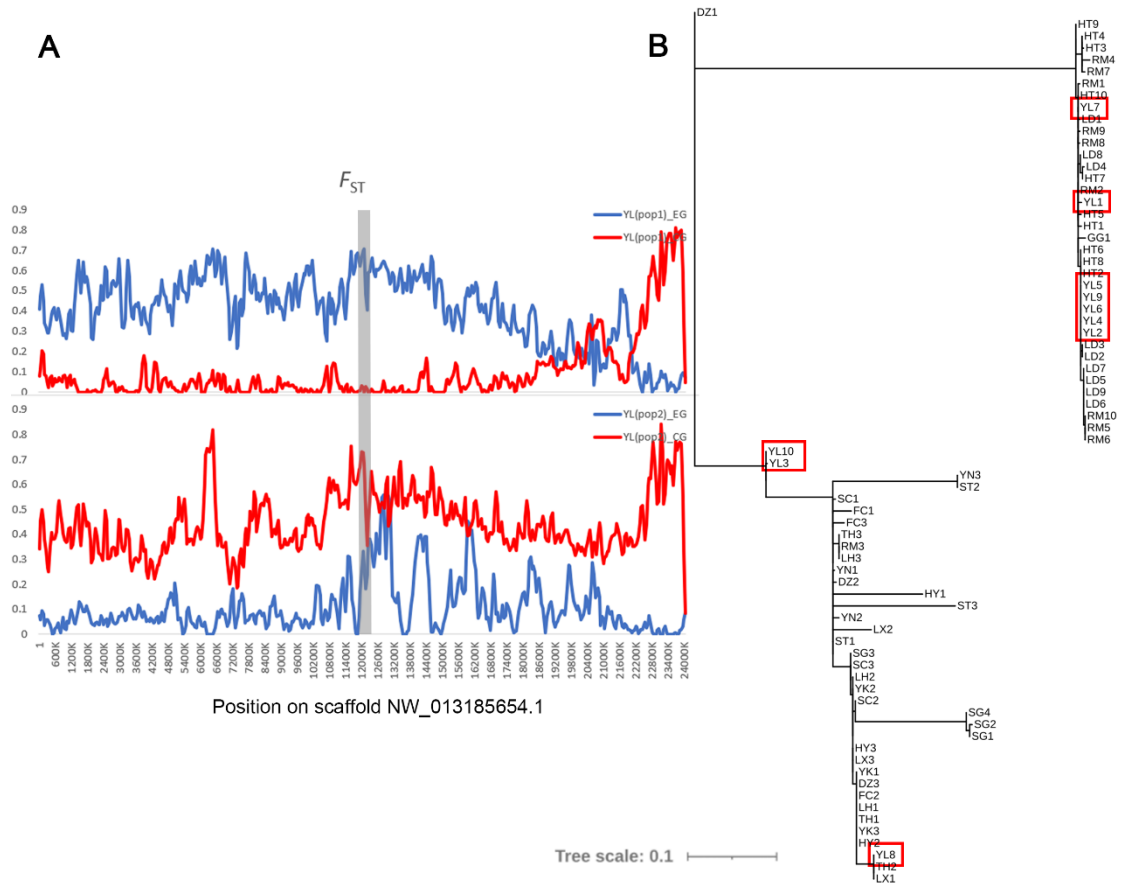

Fig. S4. Regions of *SIRT1* with introgression between Chinese domestic and Yili geese individuals. (A)  $F_{ST}$  between Yili goose individuals and the Chinese and European domestic goose populations across scaffold NW\_013185654.1. Blue line represents  $F_{ST}$  between Yili goose individuals and Landaise geese, and red line represents  $F_{ST}$  between Yili goose individuals and Chinese domestic geese. (B) NJ tree constructed by *SIRT1* sequences of region scaffold NW\_013185654.1 11939468-11959749. The red frame highlights the branches of Yili goose individuals.

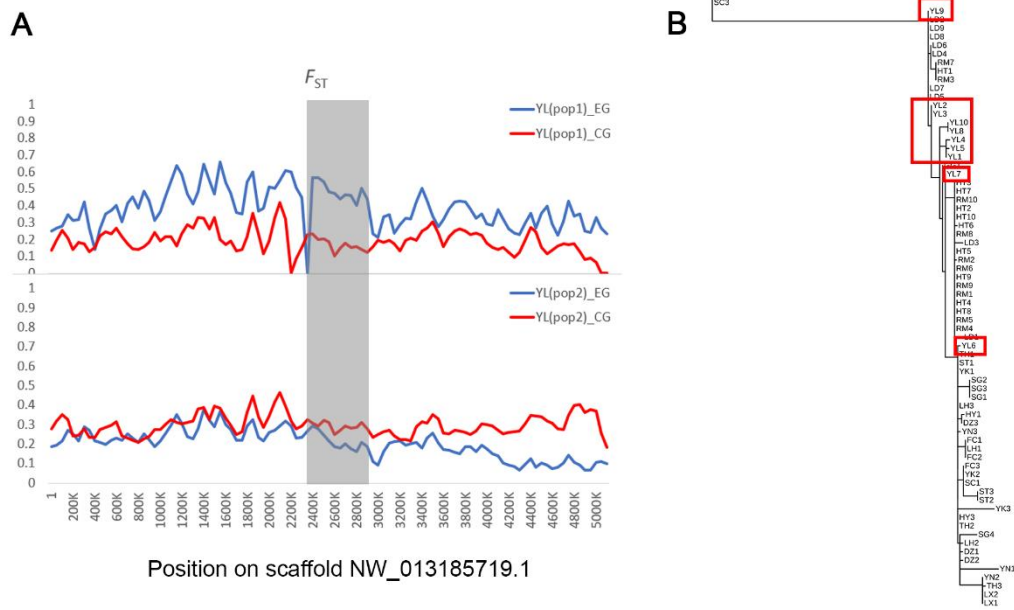

Fig. S5. Regions of *SALL3* with introgression between Chinese domestic and Yili geese individuals. (A)  $F_{ST}$  between Yili goose individuals and the Chinese and European domestic goose populations across scaffold NW\_013185719.1. Blue line represents  $F_{ST}$  between Yili goose individuals and Landaise geese, and red line represents  $F_{ST}$  between Yili goose individuals and Chinese domestic geese. (B) NJ tree constructed by *SALL3* sequences of region scaffold NW\_013185719.1 2253106-2275099. The red frame highlights the branches of Yili goose individuals.

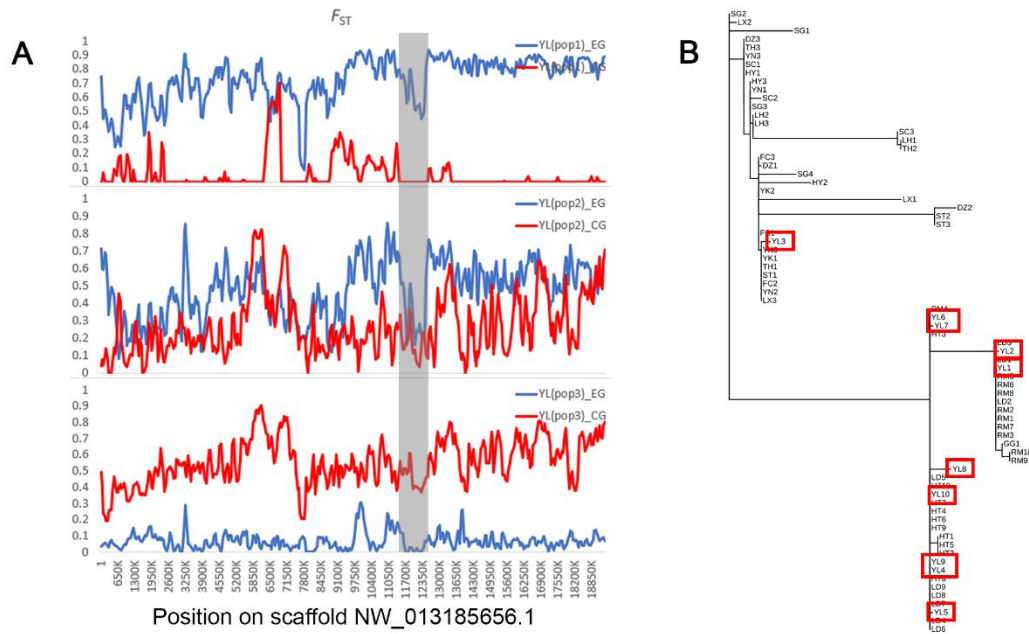

Fig. S6. Regions of *GJA5* with introgression between Chinese domestic and Yili geese individuals. (A)  $F_{ST}$  between Yili goose individuals and the Chinese and European domestic goose populations across scaffold NW\_013185656.1. Blue line represents  $F_{ST}$  between Yili goose individuals and Landaise geese, and red line represents  $F_{ST}$  between Yili goose individuals and Chinese domestic geese. (B) NJ tree constructed by *GJA5* sequences of region scaffold NW\_013185656.1 12585990-12603816. The red frame highlights the branches of Yili goose individuals.

## References

1. Kozma R, Melsted P, Magnusson KP, Høglund J. Looking into the past - the reaction of three grouse species to climate change over the last million years using whole genome sequences. *Mol Ecol*. 2016; 25(2):570-80. <https://doi.org/10.1111/mec.13496>.
